# Supplementary material
Source: HighWire-hosted journal article supplement (https://ez-admanager.com/highwire/filestream/136531/field_highwire_adjunct_files/0/tsao_619.pdf)
Supplement: tsao_619.pdf [file tsao_619.pdf]

# 动脉硬化与亚临床脑部及认知疾病进展的相关性

Connie W. Tsao, MD, MPH; Jayandra J. Himali, PhD; Alexa S. Beiser, PhD; Martin G. Larson, ScD; Charles DeCarli, MD;  
Ramachandran S. Vasan, MD; Gary F. Mitchell, MD; Sudha Seshadri, MD

**目的：**旨在验证异常动脉僵硬度和血压是否与经 MRI 及神经认知检测的评估脑老化进展相关。

**方法：**对无既往卒中或痴呆史的 Framingham 后代队列受试者 ( $n = 1,223$ ,  $61 \pm 9$  岁, 56% 女性) 在第 7 次检查 (1998~2001) 中行压平眼压测量、脑 MRI 和神经认知检测。脑 MRI 和神经认知检测的随访工作在第 8 次检查中进行 (2005~2008, 平均间隔期  $6.4 \pm 1.3$  年)。我们将第 7 次检查中的反向转换颈动脉 - 股动脉脉搏波速 (inverse-transformed carotid-femoral pulse wave, iCFPWV)、中心动脉脉压 (central pulse pressure, CPP) 和平均动脉压与第 7 次检查和第 8 次检查中的下列变量的变化进行关联：总脑容量、白质高信号体积、执行功能和抽象任务表现、连线测验 ( $\Delta$ B-A 试验) 及类似的检测。

**结果：**iCFPWV 及 CPP 基线水平较高与神经功能衰退程度更大相关 [iCFPWV 和  $\Delta$ B-A 试验间的相关性：结局变量中标准差 (SD) 单元改变 / 压力测量变量 SD 改变 ( $\beta$ )  $\pm$  标准误 (SE) =  $0.10 \pm 0.04$ ,  $p = 0.019$ ; CCP 和  $\Delta$ 相似

度间的相关性： $-0.08 \pm 0.03$ ,  $p = 0.013$ )。较高的平均动脉压，而非 iCFPWV 或 CPP，与脑白质高信号体积增加相关 [ ( $\beta \pm SE$ )  $0.07 \pm 0.03$ ,  $p = 0.017$ ]。无任何压力测量指标与大脑容积改变相关。

**结论：**对于临床上无卒中或痴呆证据的中老年人，动脉僵硬度及压力脉波增加与亚临床血管性脑损伤和较大程度的神经认知功能衰退发生远期进展相关。针对降低动脉硬度的治疗可潜在降低神经血管疾病和认知功能衰退的进展。

**Neurology® 2016;86:619–626**

(刘丽萍 审校)
